# Supplementary material
Source: PubMed Central journal article supplement (PMC3440238)
Supplement: supp_kxs015_kxs015supp.pdf [file supp_kxs015_kxs015supp.pdf]

# Supplementary Material for “Identifying Genetic Marker Sets Associated with Phenotypes via an Efficient Adaptive Score Test”

Tianxi Cai<sup>†</sup>

*Department of Biostatistics, Harvard School of Public Health, Boston, MA 02115*

XIHONG LIN

*Department of Biostatistics, Harvard School of Public Health, Boston, MA 02115*

RAYMOND J. CARROLL

*Department of Statistics, Texas A&M University, College Station, TX, USA*

## APPENDIX

### A. DISTRIBUTION OF THE TEST STATISTIC UNDER A LOCAL ALTERNATIVE

In this section, we derive the distribution of  $\widehat{Q}_{\mathcal{A}}$  under the local alternative  $H_{1n} : \beta_0 = n^{-1/2}\mathbf{b}_0$  with the true parameter value for  $\alpha$  being  $\alpha_0$  and  $\theta$  being  $\theta_{H_{1n}} = (\alpha_0^T, n^{-1/2}\mathbf{b}_0^T)^T$ . Recall that

$$\bar{\mathbf{S}}(\theta) = \begin{bmatrix} \bar{\mathbf{S}}_u(\theta)_{p_u \times 1} \\ \bar{\mathbf{S}}_v(\theta)_{p \times 1} \end{bmatrix} = n^{-1} \sum_{i=1}^n \mathcal{G}_1(\theta^T \mathbf{W}_i) \{Y_i - \mu(\theta^T \mathbf{W}_i)\} \mathbf{W}_i$$

Let  $\theta_{H_0} = (\alpha_0^T, \mathbf{0}_{p \times 1}^T)^T$  and consider the parameter space for  $\theta$  as  $\Omega_{H_{1n}} = \{(\alpha^T, n^{-1/2}\mathbf{b}^T)^T, \|\alpha - \alpha_0\| + \|\mathbf{b}\| \leq \mathcal{C}\}$  for some constant  $\mathcal{C}$ . Let  $\widehat{\mathbb{C}}_{ww}(\theta)$  be the empirical version of

$$\mathbb{C}_{ww} = \begin{bmatrix} \mathbb{C}_{uu} & \mathbb{C}_{uv} \\ \mathbb{C}_{vu} & \mathbb{C}_{vv} \end{bmatrix} = \begin{bmatrix} E\{\mathcal{G}_2(\alpha_0^T \mathbf{U})\mathbf{U}\mathbf{U}^T\} & E\{\mathcal{G}_2(\alpha_0^T \mathbf{U})\mathbf{U}\mathbf{V}^T\} \\ E\{\mathcal{G}_2(\alpha_0^T \mathbf{U})\mathbf{V}\mathbf{U}^T\} & E\{\mathcal{G}_2(\alpha_0^T \mathbf{U})\mathbf{V}\mathbf{V}^T\} \end{bmatrix}$$

obtained by replacing expectations by averages over the data. For the initial estimator, we consider  $\widehat{\beta} = \widehat{\beta}_{\text{RQL}}(\widehat{\lambda})$ , where  $\widehat{\theta}_{\text{RQL}}(\lambda) = \{\widehat{\alpha}_{\text{RQL}}(\lambda)^T, \widehat{\beta}_{\text{RQL}}(\lambda)^T\}^T$  is the solution to  $\bar{\mathbf{S}}(\theta) - \lambda(\mathbf{0}^T, \beta^T)^T = 0$  and the tuning parameter  $\widehat{\lambda}$  satisfies  $\widehat{\lambda} \rightarrow \lambda_0 \geq 0$  as  $n \rightarrow \infty$ .

We first derive asymptotic properties of  $\widehat{\theta}_{\text{RQL}}(\widehat{\lambda})$ . By a uniform law of large numbers (Pollard, 1990),  $\bar{\mathbf{S}}(\theta) - \widehat{\lambda}(\mathbf{0}^T, \beta^T)^T \rightarrow \mathbf{S}(\theta) = E\{\bar{\mathbf{S}}(\theta)\}$  and  $\widehat{\mathbb{C}}_{ww}(\theta) = \partial \bar{\mathbf{S}}(\theta) / \partial \theta^T \rightarrow \mathbb{C}_{ww}(\theta) = \partial E\{\bar{\mathbf{S}}(\theta)\} / \partial \theta^T$ , uniformly in  $\theta \in \Omega_{H_{1n}}$  in probability, as  $n \rightarrow \infty$ . Thus under  $H_{1n}$ , for any

\*<sup>†</sup> To whom correspondence should be addressed.

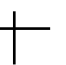

$\mathcal{C}_n = O_p(n^{-1/2})$ ,  $\sup_{\boldsymbol{\theta}^*: \|\boldsymbol{\theta}^* - \boldsymbol{\theta}_{H_{1n}}\| \leq \mathcal{C}_n} \left\| \widehat{\mathbb{C}}_{ww}(\boldsymbol{\theta}^*) - \mathbb{C}_{ww} \right\| \rightarrow_p 0$  as  $n \rightarrow \infty$ . The uniform convergence implies that under  $H_{1n}$ ,  $\widehat{\boldsymbol{\theta}}_{\text{RQL}}(\widehat{\lambda}) - \boldsymbol{\theta}_{H_{1n}} \rightarrow 0$  and  $\widehat{\boldsymbol{\alpha}}_{\text{QL}} - \boldsymbol{\alpha}_0 \rightarrow 0$  in probability, as  $n \rightarrow \infty$ . For the asymptotic distribution of  $\widehat{\boldsymbol{\theta}}_{\text{RQL}}(\widehat{\lambda})$ , by a Taylor series expansion,

$$n^{1/2} \{ \widehat{\boldsymbol{\theta}}_{\text{RQL}}(\widehat{\lambda}) - \boldsymbol{\theta}_{H_{1n}} \} = \left\{ \widehat{\mathbb{C}}_{ww}(\widehat{\boldsymbol{\theta}}^\dagger) + \begin{pmatrix} \mathbf{0}_{p_u \times p_u} & \mathbf{0}_{p_u \times p} \\ \mathbf{0}_{p \times p_u} & \widehat{\lambda} \mathbb{I}_{p \times p} \end{pmatrix} \right\}^{-1} n^{1/2} \left\{ \bar{\mathbf{S}}(\boldsymbol{\theta}_{H_{1n}}) - \widehat{\lambda}(\mathbf{0}^\text{T}, \boldsymbol{\beta}_0^\text{T})^\text{T} \right\},$$

for some  $\widehat{\boldsymbol{\theta}}^\dagger$  such that  $\|\widehat{\boldsymbol{\theta}}^\dagger - \boldsymbol{\theta}_{H_{1n}}\| \leq \|\widehat{\boldsymbol{\theta}}_{\text{RQL}}(\widehat{\lambda}) - \boldsymbol{\theta}_{H_{1n}}\|$ . It then follows from the consistency of  $\widehat{\boldsymbol{\theta}}_{\text{RQL}}(\widehat{\lambda})$  and the uniform consistency of  $\widehat{\mathbb{C}}_{ww}(\boldsymbol{\theta})$  that

$$n^{1/2} \{ \widehat{\boldsymbol{\theta}}_{\text{RQL}}(\widehat{\lambda}) - \boldsymbol{\theta}_{H_{1n}} \} = \{ \mathbb{C}_{ww}^{(\lambda_0)} \}^{-1} n^{1/2} \bar{\mathbf{S}}(\boldsymbol{\theta}_{H_{1n}}) + o_p(1), \text{ where } \mathbb{C}_{ww}^{(\lambda_0)} = \begin{pmatrix} \mathbb{C}_{uu} & \mathbb{C}_{uv} \\ \mathbb{C}_{vu} & \mathbb{C}_{vv} + \lambda_0 \mathbb{I}_{p \times p} \end{pmatrix}.$$

Thus letting  $\mathbb{B}_v^{(\lambda_0)} = [-\{\mathbb{C}_{v|u} + \lambda_0 \mathbb{I}_{p \times p}\}^{-1} \mathbb{C}_{vu} \mathbb{C}_{uu}^{-1}, \{\mathbb{C}_{v|u} + \lambda_0 \mathbb{I}_{p \times p}\}^{-1}]$ , we have  $n^{1/2} \widehat{\boldsymbol{\beta}}_{\text{RQL}}(\widehat{\lambda}) = \mathbf{b}_0 + \mathbb{B}_v^{(\lambda_0)} n^{1/2} \bar{\mathbf{S}}(\boldsymbol{\theta}_{H_{1n}}) + o_p(1)$ . Similarly,

$$n^{1/2} (\widehat{\boldsymbol{\alpha}}_{\text{QL}} - \boldsymbol{\alpha}_0) = \mathbb{C}_{uu}^{-1} n^{1/2} \bar{\mathbf{S}}_u(\boldsymbol{\theta}_{H_0}) + o_p(1) = \mathbb{C}_{uu}^{-1} \{ n^{1/2} \bar{\mathbf{S}}_u(\boldsymbol{\theta}_{H_{1n}}) + \mathbb{C}_{uv} \mathbf{b}_0 \} + o_p(1). \quad (\text{A.1})$$

Next, for the distribution of  $\widetilde{\mathbf{S}}_v$ , by a Taylor series expansion and (A.1),

$$\begin{aligned} \widetilde{\mathbf{S}}_v &= n^{1/2} \bar{\mathbf{S}}_v \{ (\widehat{\boldsymbol{\alpha}}_{\text{QL}}^\text{T}, \mathbf{0}_{p \times 1}^\text{T})^\text{T} \} = n^{1/2} \bar{\mathbf{S}}_v(\boldsymbol{\theta}_{H_{1n}}) - n^{1/2} [\mathbb{C}_{vu}, \mathbb{C}_{vv}] \begin{pmatrix} \widetilde{\boldsymbol{\alpha}} - \boldsymbol{\alpha}_0 \\ -n^{-1/2} \mathbf{b}_0 \end{pmatrix} + o_p(1) \\ &= -\mathbb{C}_{vu} \mathbb{C}_{uu}^{-1} n^{1/2} \bar{\mathbf{S}}_x(\boldsymbol{\theta}_0) + n^{1/2} \bar{\mathbf{S}}_v(\boldsymbol{\theta}_{H_{1n}}) + (\mathbb{C}_{vv} - \mathbb{C}_{vu} \mathbb{C}_{uu}^{-1} \mathbb{C}_{uv}) \mathbf{b}_0 + o_p(1) \\ &= \mathbb{A}_v n^{1/2} \bar{\mathbf{S}}(\boldsymbol{\theta}_{H_{1n}}) + \mathbb{C}_{v|u} \mathbf{b}_0 + o_p(1). \end{aligned}$$

On the other hand, by the central limit theorem,  $n^{1/2} \bar{\mathbf{S}}(\boldsymbol{\theta}_{H_{1n}}) \rightarrow \boldsymbol{\varepsilon}_w$  in distribution as  $n \rightarrow \infty$ , where  $\boldsymbol{\varepsilon}_w \sim N(\mathbf{0}, \sigma^2 \mathbb{C}_{ww})$ . Therefore, as  $n \rightarrow \infty$ ,

$$\begin{bmatrix} \widetilde{\mathbf{S}}_v \\ n^{1/2} \widehat{\boldsymbol{\beta}}_{\text{RQL}}(\widehat{\lambda}) \end{bmatrix} \rightarrow \begin{bmatrix} \mathbf{s}_0 + \mathbb{A}_v \boldsymbol{\varepsilon}_w \\ \mathbf{b}_0 + \mathbb{B}_v^{(\lambda_0)} \boldsymbol{\varepsilon}_w \end{bmatrix} \text{ in distribution.}$$

Furthermore,  $\widehat{\boldsymbol{\kappa}} \rightarrow \boldsymbol{\kappa}$  in probability as  $n \rightarrow \infty$ . It follows from the continuous mapping theorem that under  $H_{1n}$ ,  $\widehat{Q}_{\mathcal{A}} = n \|\widetilde{\mathbf{S}}_v \odot \widehat{\mathbf{Z}}\|_2^2$  converges in distribution to  $Q_{\mathcal{A}}(\mathbf{b}_0) = \|(\mathbf{b}_0 + \mathbb{B}_v^{(\lambda_0)} \boldsymbol{\varepsilon}_w) \odot (\mathbf{s}_0 + \mathbb{A}_v \boldsymbol{\varepsilon}_w) \odot \boldsymbol{\kappa}\|_2^2$ , as claimed.

## REFERENCES

POLLARD, DAVID. (1990). *Empirical processes: theory and applications*. Institute of Mathematical Statistics.

Fig. 1. Estimated marginal log-odds ratio of the SNPs (open circles) along with their 95% confidence intervals (thick solid lines). Show also are the SNP's p-values if they are less than 0.05.

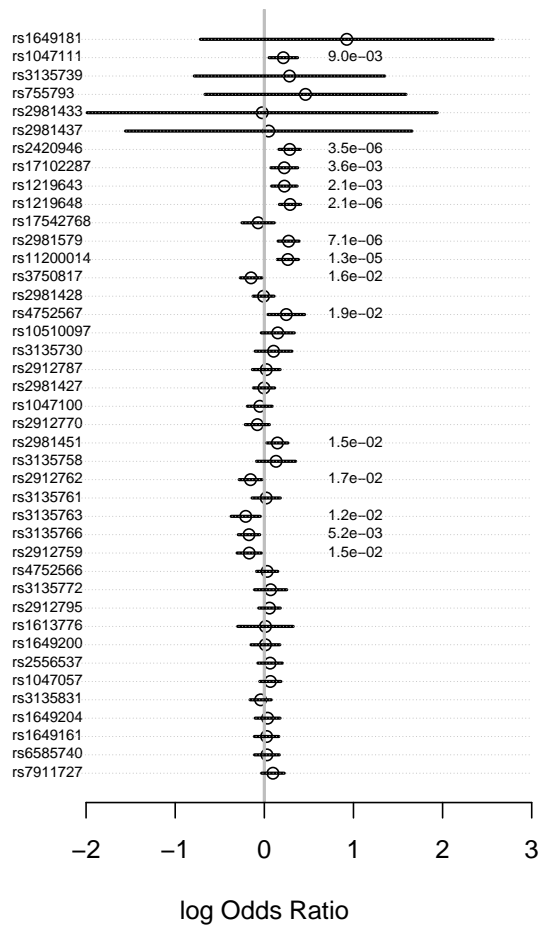

Fig. 2. LD structure of the 86 SNPs of the *ASAH1* gene and the 232 SNPs of the *FGFR2* gene from the Hapmap.

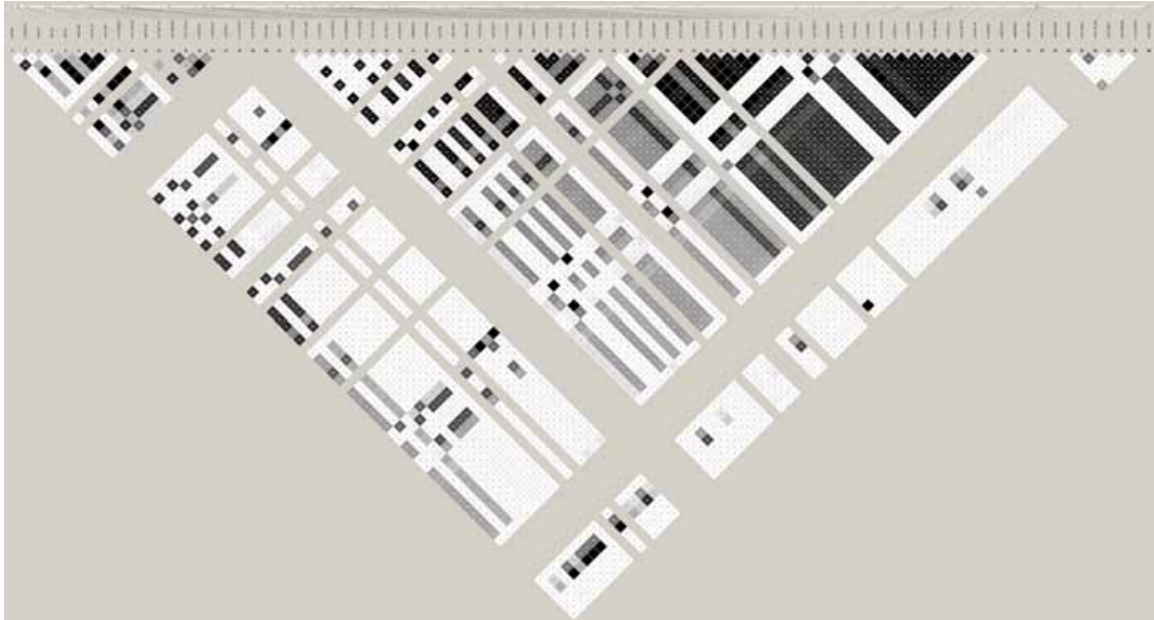

(a) *ASAH1*

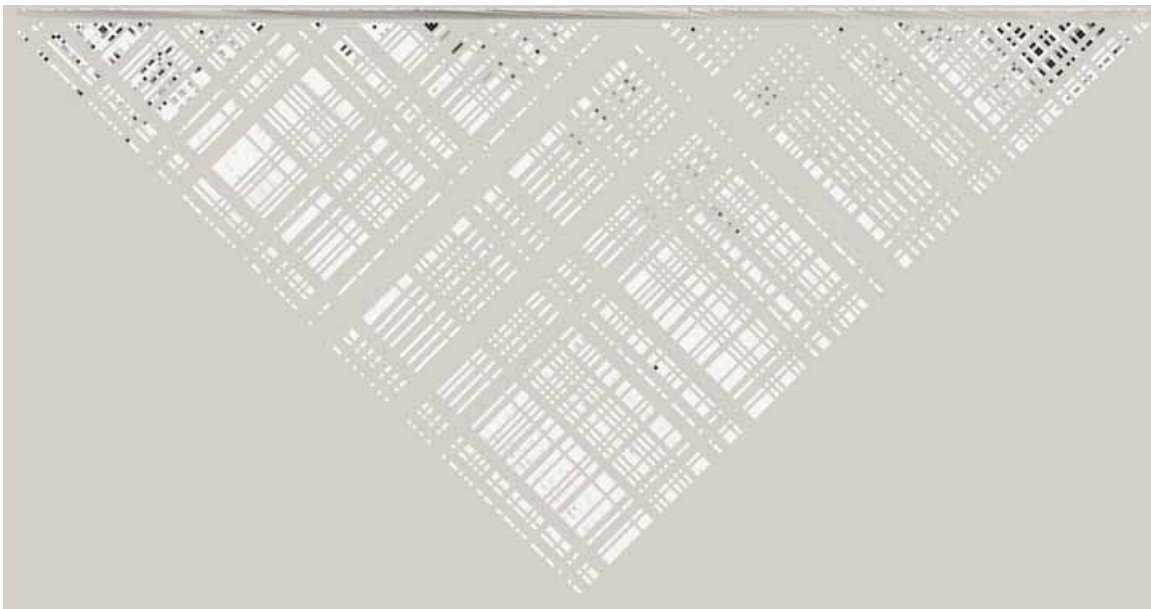

(b) *FGFR2*
